# Supplementary material
Source: PubMed Central journal article supplement (PMC4063852)
Supplement: gmic-5-245-s01.pdf [file gmic-5-245-s01.pdf]

## **Supplemental Material to:**

**Yongfei Hu, Xi Yang, Na Lu, and Baoli Zhu**

**The abundance of antibiotic resistance genes in human guts has correlation to the consumption of antibiotics in animal**

**Gut Microbes 2013; 5(2)**

**<http://dx.doi.org/10.4161/gmic.27916>**

**[http://www.landesbioscience.com/journals/gutmicrobes/  
article/27916/](http://www.landesbioscience.com/journals/gutmicrobes/article/27916/)**

Supplementary Table 1 Antibiotic resistance gene types identified in the Japanese and the US

| Resistance gene type | Sample Name (Japan) |     |     |     |     |     |     |     |     |     |     |     |     | Resistance gene type |     |     |     |     |     |     |     |  |
|----------------------|---------------------|-----|-----|-----|-----|-----|-----|-----|-----|-----|-----|-----|-----|----------------------|-----|-----|-----|-----|-----|-----|-----|--|
|                      | F1U                 | INM | F2V | F2\ | F2\ | INF | F17 | INI | F1S | F2V | IN/ | INE | INE |                      | TS3 | TS5 | TS6 | TS7 | TS9 | TS1 | TS2 |  |
| bacA                 | 1                   | 1   | 1   | 1   | 1   | 1   | 1   | 1   | 1   | 1   | 1   | 1   | 0   | tetw                 | 1   | 1   | 1   | 1   | 1   | 1   | 1   |  |
| tetO                 | 0                   | 1   | 0   | 1   | 1   | 1   | 1   | 1   | 1   | 1   | 1   | 0   | 1   | bcra                 | 1   | 1   | 1   | 1   | 1   | 1   | 1   |  |
| tetq                 | 0                   | 0   | 1   | 1   | 1   | 1   | 1   | 1   | 1   | 1   | 1   | 0   | 0   | bacA                 | 1   | 1   | 1   | 1   | 1   | 1   | 1   |  |
| tetw                 | 0                   | 0   | 1   | 1   | 1   | 1   | 1   | 1   | 1   | 1   | 0   | 0   | 1   | macb                 | 1   | 1   | 1   | 1   | 1   | 1   | 1   |  |
| acrb                 | 1                   | 1   | 1   | 0   | 0   | 1   | 1   | 1   | 1   | 0   | 0   | 0   | 0   | tetO                 | 1   | 1   | 1   | 1   | 1   | 1   | 1   |  |
| tet32                | 0                   | 0   | 1   | 1   | 1   | 1   | 0   | 0   | 1   | 0   | 1   | 0   | 0   | tetq                 | 1   | 1   | 1   | 1   | 1   | 1   | 1   |  |
| vanrg                | 0                   | 0   | 0   | 1   | 1   | 0   | 1   | 1   | 0   | 1   | 0   | 0   | 1   | bl2e_cfxa            | 1   | 1   | 1   | 1   | 1   | 1   | 1   |  |
| ermb                 | 1                   | 0   | 0   | 1   | 1   | 0   | 1   | 1   | 0   | 0   | 1   | 0   | 0   | tet32                | 1   | 1   | 1   | 1   | 1   | 1   | 1   |  |
| ermf                 | 0                   | 0   | 1   | 1   | 0   | 1   | 0   | 1   | 0   | 1   | 1   | 0   | 0   | tet37                | 1   | 1   | 1   | 1   | 1   | 1   | 1   |  |
| rosa                 | 1                   | 1   | 0   | 0   | 1   | 1   | 0   | 0   | 1   | 0   | 0   | 0   | 0   | acrb                 | 1   | 1   | 1   | 1   | 1   | 1   | 1   |  |
| tet40                | 0                   | 0   | 0   | 0   | 1   | 1   | 1   | 0   | 1   | 0   | 1   | 0   | 0   | bl2e_cepA            | 1   | 1   | 1   | 1   | 1   | 1   | 1   |  |
| bl2e_cbla            | 0                   | 0   | 0   | 1   | 1   | 1   | 0   | 0   | 1   | 0   | 0   | 0   | 0   | rosa                 | 1   | 1   | 1   | 1   | 1   | 1   | 1   |  |
| macb                 | 1                   | 1   | 0   | 0   | 0   | 0   | 0   | 1   | 0   | 0   | 0   | 1   | 0   | amrb                 | 1   | 1   | 1   | 1   | 1   | 1   | 1   |  |
| tet34                | 1                   | 1   | 1   | 0   | 0   | 1   | 0   | 0   | 0   | 0   | 0   | 0   | 0   | mexd                 | 1   | 1   | 1   | 1   | 1   | 1   | 1   |  |
| ant6ia               | 0                   | 0   | 0   | 0   | 0   | 1   | 1   | 1   | 0   | 0   | 0   | 0   | 0   | vanra                | 1   | 1   | 1   | 1   | 1   | 1   | 1   |  |
| bl1_ec               | 1                   | 0   | 1   | 0   | 0   | 0   | 0   | 0   | 0   | 0   | 0   | 1   | 0   | vanrg                | 1   | 1   | 1   | 1   | 1   | 1   | 1   |  |
| bl2e_cepA            | 0                   | 0   | 1   | 0   | 0   | 1   | 0   | 0   | 0   | 0   | 1   | 0   | 0   | vanrd                | 1   | 1   | 1   | 1   | 1   | 1   | 1   |  |
| mdtI                 | 1                   | 1   | 1   | 0   | 0   | 0   | 0   | 0   | 0   | 0   | 0   | 0   | 0   | bl2e_cbla            | 1   | 1   | 1   | 0   | 1   | 1   | 1   |  |
| pbp2                 | 1                   | 1   | 1   | 0   | 0   | 0   | 0   | 0   | 0   | 0   | 0   | 0   | 0   | mdtF                 | 1   | 1   | 1   | 1   | 0   | 1   | 1   |  |
| ermg                 | 0                   | 0   | 0   | 1   | 0   | 0   | 0   | 0   | 1   | 1   | 0   | 0   | 0   | mexf                 | 1   | 1   | 1   | 1   | 1   | 1   | 1   |  |
| ermx                 | 0                   | 1   | 0   | 1   | 0   | 0   | 0   | 0   | 0   | 0   | 0   | 0   | 1   | mefa                 | 1   | 1   | 1   | 1   | 0   | 1   | 1   |  |
| mdte                 | 1                   | 1   | 0   | 0   | 0   | 0   | 0   | 0   | 0   | 0   | 0   | 1   | 0   | smee                 | 1   | 1   | 1   | 1   | 1   | 1   | 1   |  |
| mdtF                 | 1                   | 1   | 0   | 1   | 0   | 0   | 0   | 0   | 0   | 0   | 0   | 0   | 0   | mexy                 | 1   | 1   | 1   | 1   | 1   | 1   | 1   |  |
| mdtg                 | 1                   | 1   | 0   | 1   | 0   | 0   | 0   | 0   | 0   | 0   | 0   | 0   | 0   | vansa                | 1   | 1   | 0   | 1   | 1   | 1   | 1   |  |
| mdth                 | 1                   | 0   | 1   | 0   | 0   | 0   | 1   | 0   | 0   | 0   | 0   | 0   | 0   | ant6ia               | 0   | 1   | 1   | 1   | 1   | 1   | 1   |  |
| mdto                 | 1                   | 1   | 0   | 1   | 0   | 0   | 0   | 0   | 0   | 0   | 0   | 0   | 0   | tet40                | 1   | 1   | 0   | 1   | 1   | 0   | 1   |  |
| tolc                 | 1                   | 1   | 0   | 0   | 0   | 0   | 0   | 0   | 0   | 1   | 0   | 0   | 0   | vang                 | 1   | 1   | 1   | 0   | 1   | 1   | 0   |  |
| vanra                | 0                   | 1   | 1   | 0   | 0   | 1   | 0   | 0   | 0   | 0   | 0   | 0   | 0   | catb3                | 0   | 1   | 1   | 0   | 1   | 0   | 1   |  |
| arna                 | 1                   | 0   | 0   | 0   | 0   | 0   | 1   | 0   | 0   | 0   | 0   | 0   | 0   | rosb                 | 1   | 1   | 1   | 0   | 1   | 0   | 1   |  |
| cata11               | 0                   | 0   | 0   | 0   | 0   | 0   | 1   | 1   | 0   | 0   | 0   | 0   | 0   | mexb                 | 1   | 1   | 1   | 1   | 1   | 1   | 1   |  |
| ceob                 | 1                   | 0   | 0   | 0   | 1   | 0   | 0   | 0   | 0   | 0   | 0   | 0   | 0   | vansd                | 1   | 1   | 1   | 0   | 1   | 1   | 0   |  |
| mefa                 | 0                   | 0   | 0   | 0   | 0   | 0   | 0   | 0   | 0   | 1   | 0   | 1   | 0   | ceob                 | 0   | 1   | 1   | 0   | 1   | 1   | 1   |  |
| rosb                 | 1                   | 0   | 0   | 0   | 0   | 0   | 1   | 0   | 0   | 0   | 0   | 0   | 0   | smeb                 | 1   | 1   | 1   | 1   | 0   | 0   | 1   |  |
| tet37                | 0                   | 0   | 1   | 0   | 0   | 0   | 0   | 0   | 0   | 1   | 0   | 0   | 0   | tetm                 | 0   | 0   | 1   | 1   | 0   | 0   | 0   |  |
| tetc                 | 0                   | 0   | 1   | 0   | 1   | 0   | 0   | 0   | 0   | 0   | 0   | 0   | 0   | vanrc                | 1   | 1   | 1   | 1   | 0   | 0   | 0   |  |
| tetm                 | 0                   | 1   | 0   | 0   | 0   | 0   | 0   | 0   | 0   | 0   | 0   | 0   | 1   | vanug                | 0   | 0   | 1   | 1   | 1   | 0   | 1   |  |
| tetx                 | 0                   | 0   | 0   | 0   | 0   | 0   | 0   | 0   | 1   | 0   | 1   | 0   | 0   | vatb                 | 0   | 1   | 1   | 1   | 1   | 1   | 1   |  |
| aac6ie               | 1                   | 0   | 0   | 0   | 0   | 0   | 0   | 0   | 0   | 0   | 0   | 1   | 0   | ermb                 | 1   | 1   | 0   | 1   | 1   | 1   | 1   |  |
| acra                 | 1                   | 0   | 0   | 1   | 0   | 0   | 0   | 0   | 0   | 0   | 0   | 0   | 0   | vanyb                | 0   | 0   | 1   | 1   | 1   | 0   | 1   |  |
| bl1_cmy2             | 1                   | 0   | 0   | 1   | 0   | 0   | 0   | 0   | 0   | 0   | 0   | 0   | 0   | ermg                 | 1   | 1   | 0   | 1   | 1   | 0   | 1   |  |
| mdtk                 | 1                   | 0   | 1   | 0   | 0   | 0   | 0   | 0   | 0   | 0   | 0   | 0   | 0   | catb1                | 1   | 0   | 1   | 0   | 1   | 1   | 0   |  |
| bl2_len              | 1                   | 0   | 0   | 0   | 0   | 0   | 0   | 0   | 0   | 0   | 0   | 0   | 0   | lnua                 | 1   | 0   | 1   | 0   | 1   | 0   | 1   |  |
| bl2e_cfxa            | 0                   | 0   | 0   | 0   | 0   | 0   | 0   | 0   | 0   | 0   | 1   | 0   | 0   | tetx                 | 1   | 1   | 1   | 1   | 1   | 0   | 0   |  |
| cata1                | 0                   | 0   | 0   | 0   | 1   | 0   | 0   | 0   | 0   | 0   | 0   | 0   | 0   | cara                 | 0   | 0   | 1   | 1   | 0   | 1   | 0   |  |
| cata13               | 0                   | 0   | 0   | 0   | 0   | 0   | 0   | 1   | 0   | 0   | 0   | 0   | 0   | lsa                  | 1   | 0   | 1   | 1   | 1   | 1   | 0   |  |
| cata14               | 0                   | 0   | 0   | 0   | 0   | 0   | 0   | 1   | 0   | 0   | 0   | 0   | 0   | vansg                | 0   | 0   | 1   | 1   | 1   | 1   | 0   |  |
| pbp1a                | 1                   | 0   | 0   | 0   | 0   | 0   | 0   | 0   | 0   | 0   | 0   | 0   | 0   | vanwg                | 0   | 0   | 1   | 1   | 0   | 0   | 0   |  |



samples

---

**Sample Name (The US)**

| TS1 | TS2 | TS1 | TS1 | TS2 | TS1 | TS2 | TS2 | TS2 | TS2 | TS2 | sub1 | TS2 | sub7 |
|-----|-----|-----|-----|-----|-----|-----|-----|-----|-----|-----|------|-----|------|
| 1   | 1   | 1   | 1   | 1   | 1   | 0   | 1   | 1   | 1   | 1   | 1    | 1   | 1    |
| 1   | 1   | 1   | 1   | 1   | 1   | 1   | 0   | 1   | 1   | 1   | 1    | 0   | 1    |
| 1   | 1   | 1   | 1   | 1   | 0   | 1   | 1   | 1   | 1   | 1   | 0    | 1   | 0    |
| 1   | 1   | 1   | 1   | 1   | 1   | 1   | 1   | 1   | 1   | 1   | 0    | 0   | 0    |
| 1   | 1   | 1   | 1   | 1   | 0   | 0   | 1   | 1   | 1   | 1   | 1    | 0   | 1    |
| 1   | 1   | 1   | 1   | 1   | 1   | 1   | 1   | 1   | 1   | 1   | 0    | 0   | 0    |
| 1   | 1   | 1   | 0   | 0   | 1   | 1   | 1   | 0   | 1   | 0   | 1    | 0   | 0    |
| 1   | 1   | 1   | 1   | 1   | 1   | 0   | 0   | 1   | 0   | 1   | 0    | 0   | 0    |
| 1   | 1   | 1   | 1   | 1   | 1   | 1   | 1   | 1   | 0   | 0   | 0    | 0   | 0    |
| 1   | 1   | 1   | 1   | 1   | 1   | 0   | 1   | 1   | 0   | 0   | 0    | 0   | 0    |
| 1   | 0   | 1   | 1   | 0   | 0   | 1   | 1   | 1   | 0   | 0   | 0    | 0   | 0    |
| 1   | 0   | 1   | 0   | 1   | 1   | 0   | 1   | 1   | 0   | 0   | 0    | 0   | 0    |
| 1   | 1   | 1   | 0   | 1   | 0   | 0   | 1   | 0   | 0   | 0   | 0    | 0   | 0    |
| 1   | 0   | 1   | 1   | 1   | 1   | 1   | 0   | 0   | 0   | 0   | 0    | 0   | 0    |
| 1   | 1   | 1   | 1   | 0   | 1   | 0   | 1   | 0   | 0   | 0   | 0    | 0   | 0    |
| 1   | 1   | 1   | 1   | 0   | 0   | 0   | 0   | 0   | 0   | 1   | 0    | 0   | 0    |
| 1   | 1   | 0   | 0   | 0   | 0   | 0   | 0   | 1   | 1   | 0   | 1    | 0   | 0    |
| 1   | 1   | 1   | 0   | 1   | 1   | 0   | 0   | 0   | 0   | 0   | 0    | 0   | 0    |
| 0   | 0   | 1   | 1   | 1   | 1   | 0   | 0   | 1   | 0   | 0   | 0    | 0   | 0    |
| 1   | 0   | 1   | 0   | 1   | 1   | 0   | 0   | 0   | 0   | 0   | 0    | 0   | 0    |
| 1   | 0   | 0   | 0   | 0   | 0   | 1   | 1   | 0   | 0   | 1   | 0    | 0   | 0    |
| 1   | 0   | 0   | 1   | 0   | 1   | 0   | 0   | 0   | 0   | 0   | 0    | 0   | 0    |
| 1   | 0   | 1   | 0   | 0   | 0   | 1   | 0   | 0   | 0   | 0   | 0    | 0   | 0    |
| 1   | 0   | 0   | 1   | 0   | 0   | 0   | 0   | 0   | 0   | 0   | 0    | 0   | 0    |
| 1   | 0   | 1   | 0   | 0   | 0   | 0   | 1   | 0   | 0   | 0   | 0    | 0   | 0    |
| 1   | 0   | 1   | 0   | 0   | 0   | 0   | 0   | 0   | 0   | 0   | 0    | 0   | 0    |
| 1   | 0   | 1   | 0   | 1   | 1   | 0   | 0   | 0   | 0   | 0   | 0    | 0   | 0    |
| 0   | 1   | 1   | 1   | 0   | 0   | 0   | 0   | 0   | 0   | 0   | 0    | 0   | 0    |
| 1   | 0   | 0   | 0   | 0   | 0   | 0   | 0   | 0   | 0   | 0   | 0    | 0   | 0    |
| 0   | 1   | 0   | 0   | 1   | 0   | 0   | 0   | 1   | 0   | 0   | 0    | 0   | 0    |
| 1   | 0   | 1   | 0   | 0   | 0   | 0   | 0   | 0   | 0   | 0   | 0    | 0   | 0    |
| 1   | 0   | 0   | 0   | 0   | 0   | 1   | 0   | 0   | 0   | 0   | 0    | 0   | 0    |
| 1   | 1   | 0   | 0   | 0   | 0   | 1   | 1   | 0   | 0   | 0   | 0    | 1   | 0    |
| 1   | 0   | 0   | 1   | 0   | 0   | 0   | 0   | 0   | 0   | 1   | 0    | 0   | 0    |
| 1   | 1   | 0   | 0   | 0   | 0   | 0   | 0   | 1   | 0   | 0   | 0    | 0   | 0    |
| 0   | 1   | 0   | 0   | 0   | 0   | 0   | 0   | 0   | 0   | 0   | 0    | 0   | 0    |
| 0   | 1   | 0   | 0   | 0   | 0   | 0   | 0   | 0   | 0   | 0   | 0    | 0   | 0    |
| 1   | 1   | 0   | 0   | 0   | 0   | 0   | 0   | 0   | 0   | 0   | 0    | 0   | 0    |
| 0   | 0   | 0   | 0   | 1   | 0   | 0   | 0   | 0   | 0   | 0   | 0    | 0   | 0    |
| 0   | 0   | 0   | 0   | 1   | 0   | 0   | 0   | 0   | 0   | 0   | 0    | 0   | 0    |
| 0   | 0   | 0   | 0   | 0   | 0   | 0   | 0   | 0   | 0   | 1   | 0    | 0   | 0    |
| 0   | 0   | 0   | 0   | 0   | 0   | 0   | 0   | 0   | 0   | 0   | 0    | 0   | 0    |
| 1   | 0   | 0   | 1   | 0   | 0   | 0   | 0   | 0   | 0   | 0   | 0    | 0   | 0    |
| 0   | 0   | 0   | 0   | 0   | 0   | 0   | 0   | 0   | 0   | 0   | 0    | 0   | 0    |
| 0   | 0   | 0   | 0   | 0   | 0   | 0   | 0   | 0   | 0   | 0   | 0    | 0   | 0    |
| 0   | 0   | 0   | 0   | 0   | 0   | 0   | 0   | 0   | 0   | 0   | 0    | 0   | 0    |
| 0   | 0   | 0   | 0   | 0   | 0   | 0   | 0   | 0   | 0   | 0   | 0    | 0   | 0    |
| 0   | 0   | 0   | 0   | 0   | 0   | 0   | 0   | 0   | 0   | 0   | 0    | 0   | 0    |
| 0   | 0   | 0   | 0   | 0   | 0   | 0   | 0   | 0   | 0   | 0   | 0    | 0   | 0    |
| 0   | 0   | 0   | 0   | 0   | 0   | 0   | 0   | 0   | 0   | 0   | 0    | 0   | 0    |
| 0   | 0   | 0   | 0   | 0   | 0   | 0   | 0   | 0   | 0   | 0   | 0    | 0   | 0    |
| 0   | 0   | 0   | 0   | 1   | 0   | 1   | 0   | 0   | 0   | 0   | 0    | 0   | 0    |

|   |   |   |   |   |   |   |   |   |   |   |   |   |
|---|---|---|---|---|---|---|---|---|---|---|---|---|
| 0 | 0 | 0 | 1 | 0 | 0 | 0 | 0 | 1 | 0 | 0 | 0 | 0 |
| 1 | 0 | 0 | 0 | 0 | 0 | 0 | 0 | 0 | 0 | 0 | 0 | 0 |
| 0 | 1 | 0 | 0 | 0 | 0 | 0 | 0 | 0 | 0 | 0 | 0 | 0 |
| 0 | 0 | 0 | 0 | 0 | 0 | 0 | 0 | 0 | 0 | 0 | 0 | 0 |
| 0 | 0 | 0 | 0 | 0 | 0 | 0 | 0 | 0 | 0 | 0 | 0 | 0 |
| 1 | 0 | 0 | 0 | 0 | 0 | 0 | 0 | 0 | 0 | 0 | 0 | 0 |
| 0 | 0 | 0 | 0 | 0 | 0 | 0 | 0 | 0 | 0 | 0 | 0 | 0 |
| 0 | 0 | 0 | 0 | 0 | 0 | 0 | 0 | 0 | 0 | 0 | 0 | 0 |
| 1 | 0 | 0 | 0 | 0 | 0 | 0 | 0 | 1 | 0 | 0 | 0 | 0 |
| 0 | 0 | 0 | 1 | 0 | 0 | 0 | 0 | 1 | 0 | 0 | 0 | 0 |
| 0 | 1 | 0 | 0 | 0 | 0 | 0 | 0 | 0 | 0 | 0 | 0 | 0 |
| 0 | 0 | 0 | 1 | 0 | 0 | 0 | 0 | 0 | 0 | 0 | 0 | 0 |
| 0 | 0 | 1 | 0 | 0 | 0 | 0 | 0 | 0 | 0 | 0 | 0 | 0 |
| 0 | 0 | 0 | 0 | 0 | 0 | 0 | 0 | 0 | 0 | 0 | 0 | 0 |
| 0 | 0 | 0 | 0 | 0 | 0 | 0 | 0 | 0 | 0 | 0 | 0 | 0 |
| 0 | 0 | 0 | 0 | 0 | 0 | 0 | 0 | 0 | 0 | 0 | 0 | 0 |
| 0 | 0 | 1 | 0 | 0 | 0 | 0 | 0 | 0 | 0 | 0 | 0 | 0 |
| 0 | 0 | 0 | 0 | 0 | 0 | 0 | 0 | 0 | 0 | 0 | 0 | 0 |
| 1 | 0 | 0 | 0 | 0 | 0 | 0 | 0 | 0 | 0 | 0 | 0 | 0 |
| 0 | 0 | 0 | 0 | 0 | 0 | 0 | 0 | 0 | 0 | 0 | 0 | 0 |
| 0 | 0 | 0 | 0 | 0 | 0 | 0 | 0 | 0 | 0 | 0 | 0 | 0 |
| 0 | 0 | 0 | 0 | 0 | 0 | 0 | 0 | 0 | 0 | 0 | 0 | 0 |
| 0 | 0 | 0 | 0 | 0 | 0 | 0 | 0 | 0 | 0 | 0 | 0 | 0 |
| 0 | 0 | 0 | 0 | 0 | 0 | 0 | 0 | 0 | 0 | 0 | 0 | 0 |
| 0 | 0 | 1 | 0 | 0 | 0 | 0 | 0 | 0 | 0 | 0 | 0 | 0 |
| 0 | 0 | 0 | 0 | 0 | 0 | 0 | 0 | 0 | 0 | 0 | 0 | 0 |
| 1 | 0 | 0 | 0 | 0 | 0 | 0 | 0 | 0 | 0 | 0 | 0 | 0 |
| 0 | 0 | 0 | 0 | 0 | 0 | 0 | 0 | 0 | 0 | 0 | 0 | 0 |
| 0 | 0 | 0 | 0 | 0 | 0 | 0 | 0 | 0 | 0 | 0 | 0 | 0 |
| 0 | 0 | 0 | 0 | 0 | 0 | 0 | 0 | 0 | 0 | 0 | 0 | 0 |
| 0 | 0 | 0 | 0 | 0 | 0 | 0 | 0 | 0 | 0 | 0 | 0 | 0 |
| 0 | 0 | 0 | 0 | 0 | 0 | 0 | 0 | 0 | 0 | 0 | 0 | 0 |
| 0 | 0 | 0 | 0 | 0 | 0 | 0 | 0 | 0 | 0 | 0 | 0 | 0 |
| 0 | 0 | 0 | 0 | 0 | 0 | 0 | 0 | 0 | 0 | 0 | 0 | 0 |
| 1 | 0 | 0 | 0 | 0 | 0 | 0 | 0 | 0 | 0 | 0 | 0 | 0 |
| 0 | 0 | 0 | 1 | 0 | 0 | 0 | 0 | 0 | 0 | 0 | 0 | 0 |
| 0 | 1 | 0 | 0 | 0 | 0 | 0 | 0 | 0 | 0 | 0 | 0 | 0 |
| 0 | 0 | 0 | 0 | 0 | 0 | 0 | 0 | 0 | 0 | 0 | 0 | 0 |
| 0 | 0 | 0 | 0 | 0 | 0 | 0 | 0 | 0 | 0 | 0 | 0 | 0 |
| 0 | 0 | 0 | 0 | 0 | 0 | 1 | 0 | 0 | 0 | 0 | 0 | 0 |
| 0 | 0 | 0 | 0 | 0 | 0 | 0 | 0 | 0 | 0 | 0 | 0 | 0 |
| 0 | 0 | 0 | 0 | 0 | 0 | 0 | 0 | 0 | 0 | 0 | 0 | 0 |
| 0 | 0 | 0 | 0 | 0 | 0 | 0 | 0 | 0 | 0 | 0 | 0 | 0 |
| 0 | 0 | 0 | 0 | 0 | 0 | 0 | 0 | 0 | 0 | 0 | 0 | 0 |
| 0 | 0 | 0 | 0 | 0 | 0 | 0 | 0 | 0 | 0 | 0 | 0 | 0 |
| 0 | 0 | 0 | 0 | 0 | 0 | 0 | 0 | 0 | 0 | 0 | 0 | 0 |
| 0 | 0 | 0 | 0 | 0 | 0 | 0 | 0 | 0 | 0 | 0 | 0 | 0 |
| 0 | 0 | 0 | 0 | 0 | 0 | 1 | 0 | 0 | 0 | 0 | 0 | 0 |
| 0 | 0 | 0 | 0 | 0 | 0 | 0 | 0 | 0 | 0 | 0 | 0 | 0 |
| 0 | 0 | 0 | 0 | 0 | 0 | 0 | 0 | 0 | 0 | 0 | 0 | 0 |
| 0 | 0 | 0 | 0 | 0 | 0 | 0 | 0 | 0 | 0 | 0 | 0 | 0 |

---

---

|    |    |    |    |    |    |    |    |    |    |   |   |   |
|----|----|----|----|----|----|----|----|----|----|---|---|---|
| 41 | 28 | 27 | 24 | 22 | 18 | 16 | 15 | 15 | 13 | 7 | 4 | 4 |
|----|----|----|----|----|----|----|----|----|----|---|---|---|
